# Supplementary material for: Quality of Life and Psychological Distress in Portuguese Older Individuals with Tinnitus
Source: MDPI journal article supplement (doi:10.3390/brainsci11070953), 2021-07-20
Supplement: s1 [file s1]

## Supplementary material

### “Quality of Life and Psychological Distress in Portuguese older individual’s with Tinnitus”

Haula F. Haider\*, Sara F. Ribeiro\*, Derek J. Hoare, Graça Fialho, Deborah A. Hall, Marília Antunes, Helena Caria, João Paço

Correspondence: HH: [haula.f.haider@cuf.pt](mailto:haula.f.haider@cuf.pt) ; SR: [sara.f.ribeiro@cuf.pt](mailto:sara.f.ribeiro@cuf.pt)

**Table S1.** Distribution of Tinnitus Pitch

| Freq.<br>(Hz) | 125  | 250  | 500  | 1000 | 1500 | 2000 | 3000 | 4000 | 6000 | 8000 |
|---------------|------|------|------|------|------|------|------|------|------|------|
| n             | 2    | 2    | 3    | 11   | 1    | 15   | 4    | 7    | 7    | 30   |
| %             | 0.02 | 0.02 | 0.04 | 0.13 | 0.01 | 0.18 | 0.05 | 0.09 | 0.09 | 0.37 |

n: total number of individuals; %: percentage of individuals

**Table S2.** Mean and standard deviation of hearing thresholds for the worse ear

| Frequency<br>(Hz) | Tinnitus<br>Mean (SD) | No Tinnitus<br>Mean (SD) | Mean<br>Difference | p-value  |
|-------------------|-----------------------|--------------------------|--------------------|----------|
| 250               | 15.4 (7.9)            | 14.5 (5.4)               | 1.0                | 0.443    |
| 500               | 15.9 (6.8)            | 15.8 (5.7)               | 1.8                | 0.143    |
| 1000              | 18.3 (9.0)            | 19.1 (7.5)               | 2.2                | 0.150    |
| 2000              | 27.0 (14.5)           | 23.8 (11.3)              | 6.4                | 0.003 ** |
| 4000              | 44.0 (20.3)           | 37.7 (19.3)              | 11.6               | 0.001 ** |
| 8000              | 58.4 (22.2)           | 45.9 (25.0)              | 14.6               | 0.003 ** |
| 10000             | 69.4 (22.2)           | 55.2 (20.9)              | 9.4                | 0.053    |
| 12000             | 79.3 (21.2)           | 66.7 (18.5)              | 3.8                | 0.351    |
| 14000             | 90.9 (22.3)           | 85.8 (22.2)              | 0.5                | 0.911    |
| 16000             | 92.3 (25.9)           | 88.8 (25.9)              | -3.5               | 0.487    |

\* p-values<0.05, \*\*; p-values <0.01, according to Welch two sample t-test

**Table S3.** Mean and standard deviation of hearing thresholds for the best ear

| Frequency<br>Hz | Tinnitus<br>Mean (SD) | No Tinnitus<br>Mean (SD) | Mean<br>Difference | p-value |
|-----------------|-----------------------|--------------------------|--------------------|---------|
| 250             | 11.4 (6.6)            | 10.8 (5.3)               | 0.6                | 0.580   |
| 500             | 11.9 (6.7)            | 10.0 (5.6)               | 1.9                | 0.129   |
| 1000            | 13.7(8.1)             | 11.1 (6.8)               | 2.6                | 0.082   |
| 2000            | 20.1 (12.7)           | 15.0 (8.9)               | 5.1                | 0.015*  |
| 4000            | 35.9 (18.9)           | 26.7 (16.0)              | 9.2                | 0.009** |
| 8000            | 49.0 (21.9)           | 34.4 (20.5)              | 14.6               | 0.001** |
| 10000           | 60.9 (21.4)           | 50.5 (20.7)              | 10.4               | 0.018*  |
| 12000           | 67.5 (18.9)           | 67.9 (18.5)              | -0.4               | 0.921   |
| 14000           | 78.7 (23.7)           | 80.6 (19.4)              | -1.9               | 0.652   |
| 16000           | 86.3 (26.9)           | 83.8 (24.8)              | 2.5                | 0.628   |

\* p-values<0.05, \*\*; p-values <0.01, according to Welch two sample t-test

**Table S4.** Significant and trend p-values of the post-hoc pairwise comparisons, with p-values adjusted for multiple comparisons by the Tukey method.

|             | No Tinnitus –<br>Irrelevant/Mild | No Tinnitus –<br>Mod/Sev/Cat | Irrelevant/Mild –<br>Mod/Sev/Cat |
|-------------|----------------------------------|------------------------------|----------------------------------|
| MOS.DC      | -                                | 0.098                        | 0.078                            |
| MOS.SG      | -                                | 0.003                        | 0.005                            |
| MOS.CF      | -                                | 0.021                        | 0.045                            |
| MOS.V       | -                                | 0.012                        | -                                |
| MOS.SF      | -                                | -                            | 0.045                            |
| MOS.HC      | -                                | <0.001                       | 0.011                            |
| MOS.Mean.CF | -                                | 0.021                        | 0.045                            |
| MOS.Mean.CE | -                                | 0.004                        | 0.072                            |
| MOS.Mean.F  | -                                | 0.004                        | 0.029                            |

Only p-values <0.05 or <0.1 are presented.

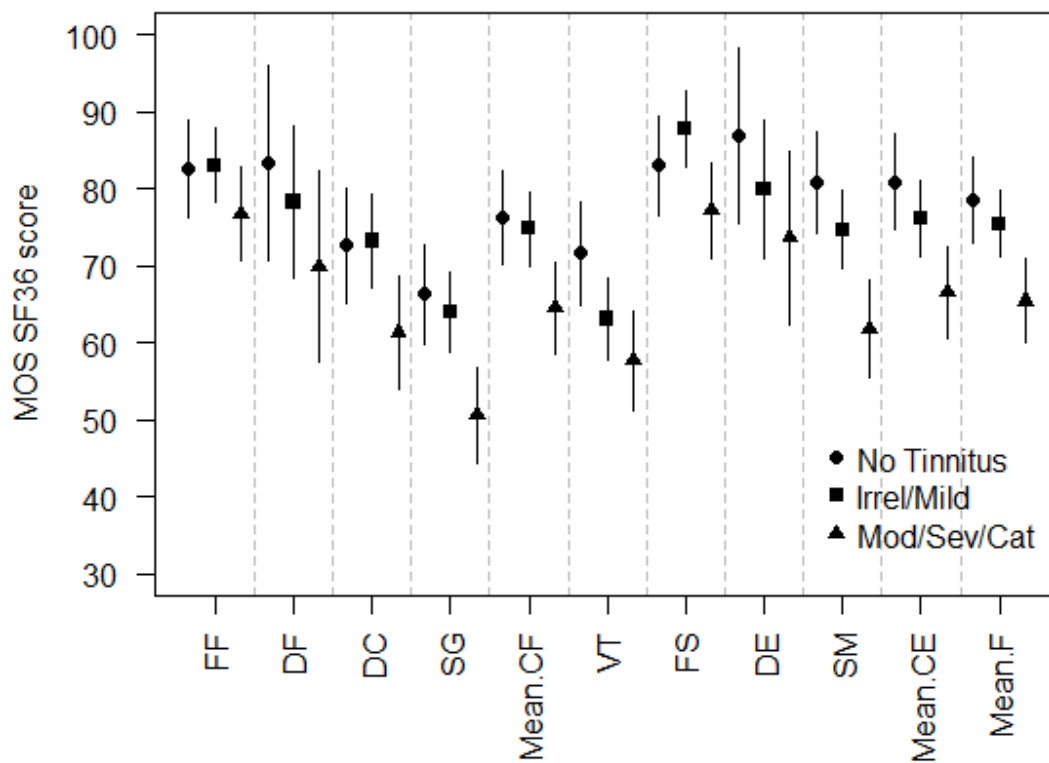

**Figure S1.** Average scores of the MOS SF-36 questionnaire and correspondent 95% confidence interval bands for the three groups of Tinnitus severity.

**Table S5.** Significant and trend p-values of the post-hoc pairwise comparisons of the BSI scores, with p-values adjusted for multiple comparisons by the Tukey method.

|          | No Tinnitus –<br>Irrelevant/Mild | No Tinnitus –<br>Irrelevant/Mild | Irrelevant/Mild –<br>Moderate/Severe/Catastrophic |
|----------|----------------------------------|----------------------------------|---------------------------------------------------|
| BSI.SOM  | -                                | 0.08                             | 0.055                                             |
| BSI.O-C  | -                                | -                                | 0.032                                             |
| BSI.I-S  | -                                | -                                | -                                                 |
| BSI.DEP  | -                                | 0.005                            | 0.035                                             |
| BSI.ANX  | -                                | 0.016                            | 0.033                                             |
| BSI.HOS  | -                                | 0.012                            | 0.022                                             |
| BSI.PHOB | -                                | 0.019                            | 0.033                                             |
| BSI.PAR  | -                                | -                                | -                                                 |
| BSI.PSI  | -                                | -                                | -                                                 |
| BSI.GSI  | -                                | -                                | 0.008                                             |
| BSI.PST  | -                                | -                                | 0.003                                             |
| BSI.PSDI | -                                | -                                | 0.034                                             |

Only p-values <0.05 or <0.1 are presented.

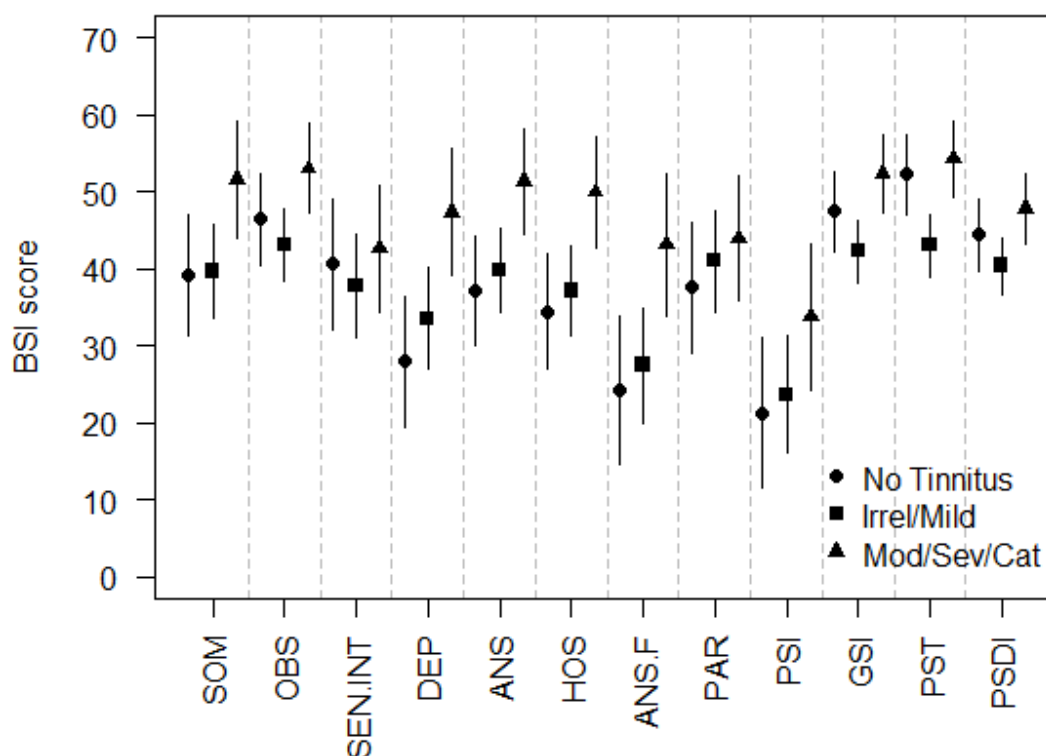

**Figure S2.** Average scores of the BSI questionnaire and correspondent 95% confidence interval bands for the three groups of Tinnitus severity.
